# Supplementary material for: A systematic review and meta‐analysis of the use of renin‐angiotensin system drugs and COVID‐19 clinical outcomes: What is the evidence so far?
Source: PubMed Central journal article supplement (PMC7575889; doi:10.1002/prp2.666), 2020-10-20

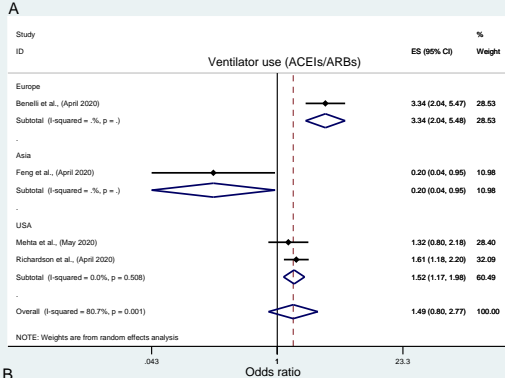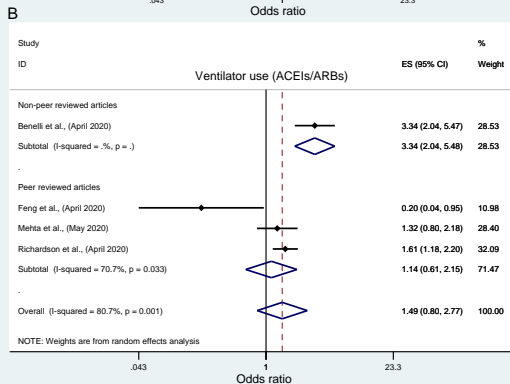

Supplement: PRP2-8-e00666-s011.pdf [file PRP2-8-e00666-s011.pdf]
